# Supplementary material
Source: publisher figshare collection journal article supplement (https://diabetesjournals.figshare.com/ndownloader/files/25717139)
Supplement: Supplementary file 1 [file 25717139]

# Supplementary Figure 1. Questions asking about habitual consumption of oily fish and non-oily fish in the UK Biobank

## Oily fish

How often do you eat oily fish?  
(e.g. sardines, salmon, mackerel, herring)

- Never
- Less than once a week
- Once a week
- 2-4 times a week
- 5-6 times a week
- Once or more daily
- Do not know
- Prefer not to answer

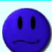

Back

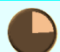

Info

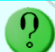

Help

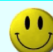

Next

Please provide an average considering your intake over the last year.

*If you are unsure, please provide an estimate or select Do not know.*

**Oily fish include:**

- Salmon Anchovies
- Trout Swordfish
- Mackerel Bloater
- Herring Cacha
- Sardines Carp
- Pilchards Hilsa
- Kipper Jack fish
- Eel Katla
- Whitebait Orange roughly
- Tuna (fresh only) Pangas
- Sprats

## Non-oily fish

How often do you eat other types of fish?  
(e.g. cod, tinned tuna, haddock)

- Never
- Less than once a week
- Once a week
- 2-4 times a week
- 5-6 times a week
- Once or more daily
- Do not know
- Prefer not to answer

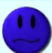

Back

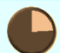

Info

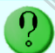

Help

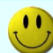

Next

Please provide an average considering your intake over the last year.

*If you are unsure, please provide an estimate or select Do not know.*

**Supplementary Table 1. Baseline participant characteristics according to fish oil supplement use**

|                                        | Regular use of fish oil supplements |             |
|----------------------------------------|-------------------------------------|-------------|
|                                        | No                                  | Yes         |
| No of participants                     | 268,937                             | 123,350     |
| Age, years                             | 54.8 ± 8.1                          | 58.1 ± 7.5  |
| Men, %                                 | 46.1                                | 42.7        |
| White ethnicity, %                     | 90.6                                | 91.4        |
| Townsend deprivation index >0*         | 28.4                                | 24.7        |
| Smoking status, %                      |                                     |             |
| Never                                  | 57.1                                | 55.4        |
| Former                                 | 31.8                                | 36.6        |
| Current                                | 11.1                                | 8.0         |
| Alcohol 1-4 drinks/week, %             | 49.9                                | 50.9        |
| Total PA, MET-h/week                   | 43.2 ± 44.8                         | 48.1 ± 46.3 |
| MVPA meets guideline†, %               | 52.9                                | 59.5        |
| BMI, kg/m <sup>2</sup>                 | 27.2 ± 4.7                          | 26.9 ± 4.4  |
| Hypertension, %                        | 51.6                                | 56.8        |
| Hyperlipidemia, %                      | 10.9                                | 14.1        |
| Coffee, cups/d                         | 2.1 ± 2.1                           | 1.9 ± 1.9   |
| Cereal, bowls/d                        | 0.6 ± 0.4                           | 0.7 ± 0.4   |
| Fresh fruit, pieces/d                  | 2.1 ± 1.6                           | 2.4 ± 1.6   |
| Fresh vegetables, heaped tablespoons/d | 4.8 ± 3.3                           | 5.1 ± 3.3   |
| Red meat ≥2 servings/week, %           | 50.0                                | 49.5        |
| Poultry ≥2 servings/week, %            | 48.4                                | 48.5        |
| Processed meat ≥2 servings/week, %     | 31.9                                | 28.0        |
| Oily fish ≥2 servings/week             | 15.4                                | 22.1        |
| Non-oily fish ≥2 servings/week         | 15.4                                | 18.0        |

Data are presented as mean ± SD unless where otherwise indicated. BMI, body mass index; MET, metabolic equivalent; MVPA, moderate-to-vigorous physical activity; NA, not applicable; PA, physical activity.

\*A higher Townsend deprivation index indicates a greater degree of deprivation (or lower socioeconomic status).

†At or above 150 min/week of moderate activity or 75 min/week of vigorous activity.

**Supplementary Table 2. Subgroup analysis for the associations of oily and non-oily fish intake and fish oil supplements with risk of type 2 diabetes\***

| Subgroup               | Cases, n | Oily fish, per 1 serv/week |        |       | Non-oily fish, per 1 serv/week |       |       | Fish oil, yes vs. no |        |       |
|------------------------|----------|----------------------------|--------|-------|--------------------------------|-------|-------|----------------------|--------|-------|
|                        |          | RR (95% CI)                | P      | P-int | RR (95% CI)                    | P     | P-int | RR (95% CI)          | P      | P-int |
| Age                    |          |                            |        |       |                                |       |       |                      |        |       |
| <60 y                  | 3,464    | 0.92 (0.87-0.97)           | 0.003  | 0.660 | 0.99 (0.94-1.03)               | 0.570 | 0.670 | 0.91 (0.84-0.98)     | 0.017  | 0.560 |
| ≥60 y                  | 3,798    | 0.93 (0.89-0.98)           | 0.003  |       | 0.99 (0.95-1.04)               | 0.790 |       | 0.91 (0.85-0.97)     | 0.004  |       |
| Sex                    |          |                            |        |       |                                |       |       |                      |        |       |
| Women                  | 3,197    | 0.93 (0.88-0.98)           | 0.012  | 0.620 | 0.96 (0.92-1.01)               | 0.170 | 0.230 | 0.89 (0.82-0.96)     | 0.003  | 0.870 |
| Men                    | 4,065    | 0.92 (0.87-0.96)           | <0.001 |       | 1.01 (0.96-1.06)               | 0.730 |       | 0.92 (0.86-0.99)     | 0.026  |       |
| Smoking status         |          |                            |        |       |                                |       |       |                      |        |       |
| Never                  | 3,375    | 0.93 (0.89-0.99)           | 0.012  | 0.220 | 0.96 (0.91-1.01)               | 0.082 | 0.360 | 0.90 (0.83-0.97)     | 0.006  | 0.650 |
| Former                 | 2,802    | 0.94 (0.89-0.995)          | 0.034  |       | 1.04 (0.98-1.10)               | 0.230 |       | 0.93 (0.86-1.01)     | 0.075  |       |
| Current                | 1,060    | 0.87 (0.79-0.95)           | 0.004  |       | 0.99 (0.91-1.08)               | 0.860 |       | 0.90 (0.78-1.04)     | 0.160  |       |
| Alcohol drinking       |          |                            |        |       |                                |       |       |                      |        |       |
| Never                  | 883      | 0.87 (0.79-0.96)           | 0.006  | 0.360 | 1.05 (0.96-1.14)               | 0.280 | 0.590 | 0.77 (0.66-0.91)     | 0.002  | 0.048 |
| ≤2 drinks/week         | 3,868    | 0.94 (0.89-0.99)           | 0.013  |       | 0.98 (0.93-1.02)               | 0.290 |       | 0.95 (0.89-1.02)     | 0.150  |       |
| >2 drinks/week         | 2,507    | 0.93 (0.88-0.99)           | 0.026  |       | 0.98 (0.92-1.05)               | 0.580 |       | 0.90 (0.82-0.98)     | 0.015  |       |
| BMI                    |          |                            |        |       |                                |       |       |                      |        |       |
| <25                    | 628      | 0.83 (0.74-0.94)           | 0.004  | 0.029 | 1.07 (0.96-1.20)               | 0.220 | 0.020 | 0.75 (0.63-0.89)     | 0.001  | 0.017 |
| 25-<30                 | 2,492    | 0.90 (0.85-0.96)           | 0.001  |       | 0.93 (0.88-0.99)               | 0.025 |       | 0.85 (0.78-0.93)     | <0.001 |       |
| ≥30                    | 4,075    | 0.96 (0.92-1.01)           | 0.092  |       | 1.00 (0.96-1.05)               | 0.950 |       | 0.99 (0.93-1.06)     | 0.820  |       |
| Meet PA recommendation |          |                            |        |       |                                |       |       |                      |        |       |
| No                     | 3,027    | 0.90 (0.85-0.96)           | <0.001 | 0.340 | 1.00 (0.95-1.05)               | 0.900 | 0.990 | 0.94 (0.87-1.03)     | 0.230  | 0.560 |
| Yes                    | 2,643    | 0.94 (0.89-0.996)          | 0.035  |       | 0.96 (0.91-1.02)               | 0.200 |       | 0.91 (0.84-0.99)     | 0.027  |       |
| Hypertension           |          |                            |        |       |                                |       |       |                      |        |       |
| No                     | 1,700    | 0.88 (0.81-0.94)           | <0.001 | 0.480 | 1.03 (0.96-1.10)               | 0.410 | 0.290 | 0.85 (0.76-0.95)     | 0.004  | 0.630 |
| Yes                    | 5,562    | 0.94 (0.90-0.98)           | 0.002  |       | 0.97 (0.94-1.01)               | 0.190 |       | 0.92 (0.87-0.98)     | 0.007  |       |
| Hyperlipidemia         |          |                            |        |       |                                |       |       |                      |        |       |
| No                     | 5,259    | 0.91 (0.87-0.95)           | <0.001 | 0.280 | 1.00 (0.96-1.04)               | 0.960 | 0.370 | 0.87 (0.82-0.92)     | <0.001 | 0.035 |
| Yes                    | 2,003    | 0.96 (0.89-1.02)           | 0.170  |       | 0.96 (0.89-1.02)               | 0.180 |       | 1.01 (0.92-1.10)     | 0.920  |       |

|                       |       |                  |        |       |                  |       |       |                   |        |       |
|-----------------------|-------|------------------|--------|-------|------------------|-------|-------|-------------------|--------|-------|
| Fish oil supplement   |       |                  |        |       |                  |       |       |                   |        |       |
| No                    | 5,111 | 0.89 (0.85-0.94) | <0.001 | 0.005 | 0.98 (0.94-1.02) | 0.340 | 0.310 | NA                | NA     | NA    |
| Yes                   | 2,151 | 0.98 (0.92-1.04) | 0.500  |       | 1.01 (0.95-1.08) | 0.440 |       | NA                | NA     |       |
| Oily fish intake      |       |                  |        |       |                  |       |       |                   |        |       |
| <1 serv/week          | 3,463 | NA               | NA     | NA    | 0.96 (0.91-1.00) | 0.053 | 0.037 | 0.86 (0.79-0.93)  | <0.001 | 0.044 |
| ≥1 serv/week          | 3,799 | NA               | NA     |       | 1.02 (0.97-1.07) | 0.450 |       | 0.94 (0.88-1.01)  | 0.100  |       |
| Processed meat intake |       |                  |        |       |                  |       |       |                   |        |       |
| <2 serv/week          | 4,477 | 0.93 (0.89-0.98) | 0.003  | 0.670 | 0.99 (0.94-1.03) | 0.510 | 0.920 | 0.91 (0.85-0.97)  | 0.003  | 0.730 |
| ≥2 serv/week          | 2,785 | 0.91 (0.86-0.96) | 0.001  |       | 0.99 (0.94-1.05) | 0.700 |       | 0.92 (0.84-0.998) | 0.044  |       |

\*Where appropriate, results were adjusted for covariates listed for model 3 in the footnotes to Table 2 (for fish) or Table 3 (for fish oil) in the article.

**Supplementary Table 3. Associations of oily and non-oily fish intake and fish oil supplements with risk of type 2 diabetes in 86,204 obese participants (BMI  $\geq 30$  kg/m<sup>2</sup>), according to hypertension/hyperlipidemia status\***

| Subgroup                      | Cases, n | Oily fish, per 1 serv/week |       |       | Non-oily fish, per 1 serv/week |      |       | Fish oil, yes vs. no    |              |              |
|-------------------------------|----------|----------------------------|-------|-------|--------------------------------|------|-------|-------------------------|--------------|--------------|
|                               |          | RR (95% CI)                | P     | P-int | RR (95% CI)                    | P    | P-int | RR (95% CI)             | P            | P-int        |
| Hypertension                  |          |                            |       |       |                                |      |       |                         |              |              |
| Yes                           | 3,283    | 0.97 (0.92-1.02)           | 0.21  | 0.95  | 0.99 (0.94-1.04)               | 0.59 | 0.24  | 1.03 (0.95-1.11)        | 0.48         | 0.10         |
| No                            | 792      | 0.93 (0.83-1.04)           | 0.18  |       | 1.06 (0.96-1.17)               | 0.24 |       | <b>0.83 (0.70-0.99)</b> | <b>0.033</b> |              |
| Hyperlipidemia                |          |                            |       |       |                                |      |       |                         |              |              |
| Yes                           | 1,143    | 1.00 (0.91-1.09)           | 0.91  | 0.75  | 0.95 (0.87-1.04)               | 0.26 | 0.24  | 1.11 (0.98-1.26)        | 0.090        | 0.081        |
| No                            | 2,932    | 0.95 (0.90-1.00)           | 0.060 |       | 1.02 (0.97-1.08)               | 0.44 |       | 0.94 (0.86-1.02)        | 0.15         |              |
| Hypertension & hyperlipidemia |          |                            |       |       |                                |      |       |                         |              |              |
| With both                     | 1,042    | 1.01 (0.92-1.10)           | 0.88  | 0.80  | 0.95 (0.87-1.05)               | 0.32 | 0.13  | 1.10 (0.96-1.25)        | 0.16         | <b>0.022</b> |
| With only one                 | 2,342    | 0.95 (0.89-1.01)           | 0.080 |       | 1.00 (0.94-1.06)               | 0.97 |       | 1.00 (0.91-1.10)        | 0.96         |              |
| With neither                  | 691      | 0.94 (0.84-1.05)           | 0.29  |       | 1.09 (0.98-1.21)               | 0.13 |       | <b>0.77 (0.64-0.93)</b> | <b>0.006</b> |              |

\*Where appropriate, results were adjusted for covariates listed for model 3 in the footnotes to Table 2 (for fish) or Table 3 (for fish oil) in the article.

**Supplementary Table 4. Oily and non-oily fish intake and fish oil supplements in relation to risk of type 2 diabetes, excluding 142,530 participants who reported major dietary changes in the past 5 years**

|                             | No. of cases/participants | HR (95% CI), model 3 |
|-----------------------------|---------------------------|----------------------|
| <b>Oily fish intake</b>     |                           |                      |
| Never                       | 555/27,868                | 1.00 (Referent)      |
| <1 serving/week             | 1,355/88,312              | 0.84 (0.75-0.94)     |
| 1 serving/week              | 1,317/94,699              | 0.78 (0.70-0.88)     |
| ≥2 servings/week            | 524/38,878                | 0.73 (0.64-0.84)     |
| P for trend                 |                           | <0.001               |
| Per 1 serving/week          | 3,751/249,757             | 0.90 (0.85-0.95)     |
| <b>Non-oily fish intake</b> |                           |                      |
| Never                       | 208/12,159                | 1.00 (Referent)      |
| <1 serving/week             | 1,131/74,682              | 0.90 (0.77-1.07)     |
| 1 serving/week              | 1,907/125,504             | 0.96 (0.82-1.14)     |
| ≥2 servings/week            | 505/37,412                | 0.88 (0.73-1.06)     |
| P for trend                 |                           | 0.40                 |
| Per 1 serving/week          | 3,751/249,757             | 0.98 (0.93-1.03)     |
| <b>Fish oil supplements</b> |                           |                      |
| 0 (No)                      | 2,659/173,335             | 1.00 (Referent)      |
| 1 (Yes)                     | 1,092/76,422              | 0.93 (0.86-1.00)     |
| P value                     |                           | 0.053                |

**Supplementary Table 5. Oily and non-oily fish intake and fish oil supplements in relation to risk of type 2 diabetes, excluding 2,084 incident cases that occurred within the first 4 years of follow-up**

|                             | No. of cases/participants | HR (95% CI), model 3 |
|-----------------------------|---------------------------|----------------------|
| <b>Oily fish intake</b>     |                           |                      |
| Never                       | 735/42,333                | 1.00 (Referent)      |
| <1 serving/week             | 1,753/131,589             | 0.86 (0.78-0.95)     |
| 1 serving/week              | 1,804/147,895             | 0.80 (0.72-0.88)     |
| ≥2 servings/week            | 886/68,386                | 0.80 (0.72-0.90)     |
| P for trend                 |                           | <0.001               |
| Per 1 serving/week          | 5,178/390,203             | 0.93 (0.89-0.97)     |
| <b>Non-oily fish intake</b> |                           |                      |
| Never                       | 283/18,118                | 1.00 (Referent)      |
| <1 serving/week             | 1,496/114,177             | 0.88 (0.76-1.02)     |
| 1 serving/week              | 2,593/194,571             | 0.94 (0.81-1.08)     |
| ≥2 servings/week            | 806/63,337                | 0.88 (0.75-1.02)     |
| P for trend                 |                           | 0.25                 |
| Per 1 serving/week          | 5,178/390,203             | 0.98 (0.94-1.02)     |
| <b>Fish oil supplements</b> |                           |                      |
| 0 (No)                      | 3,648/267,474             | 1.00 (Referent)      |
| 1 (Yes)                     | 1,530/122,729             | 0.92 (0.86-0.97)     |
| P value                     |                           | 0.005                |

**Supplementary Table 6. Oily and non-oily fish intake and fish oil supplements in relation to risk of type 2 diabetes, adjusting for metabolic biomarkers\***

|                             | No. of cases/<br>participants | Model 3          | Model 3 +<br>triglycerides | Model 3 +<br>HDL-C | Model 3 +<br>non-HDL-C | Model 3 +<br>CRP | Model 3 +<br>HbA1c |
|-----------------------------|-------------------------------|------------------|----------------------------|--------------------|------------------------|------------------|--------------------|
| <b>Oily fish intake</b>     |                               |                  |                            |                    |                        |                  |                    |
| Never                       | 876/36,738                    | 1.00 (Referent)  | 1.00 (Referent)            | 1.00 (Referent)    | 1.00 (Referent)        | 1.00 (Referent)  | 1.00 (Referent)    |
| <1 serving/week             | 2,083/113,952                 | 0.85 (0.79-0.93) | 0.86 (0.79-0.94)           | 0.87 (0.80-0.95)   | 0.85 (0.78-0.93)       | 0.86 (0.79-0.94) | 0.84 (0.77-0.92)   |
| 1 serving/week              | 2,236/128,170                 | 0.81 (0.74-0.88) | 0.84 (0.77-0.92)           | 0.84 (0.77-0.92)   | 0.81 (0.74-0.88)       | 0.83 (0.76-0.90) | 0.80 (0.73-0.88)   |
| ≥2 servings/week            | 1,069/59,274                  | 0.78 (0.71-0.87) | 0.85 (0.77-0.94)           | 0.84 (0.76-0.93)   | 0.78 (0.71-0.87)       | 0.81 (0.73-0.90) | 0.79 (0.71-0.88)   |
| P for trend                 |                               | <0.001           | 0.016                      | 0.005              | <0.001                 | 0.001            | <0.001             |
| Per 1 serving/week          | 6,264/338,134                 | 0.93 (0.89-0.96) | 0.96 (0.92-1.00)           | 0.95 (0.92-0.99)   | 0.93 (0.89-0.96)       | 0.94 (0.90-0.97) | 0.93 (0.89-0.97)   |
| <b>Non-oily fish intake</b> |                               |                  |                            |                    |                        |                  |                    |
| Never                       | 335/15,636                    | 1.00 (Referent)  | 1.00 (Referent)            | 1.00 (Referent)    | 1.00 (Referent)        | 1.00 (Referent)  | 1.00 (Referent)    |
| <1 serving/week             | 1,782/98,731                  | 0.86 (0.75-0.98) | 0.88 (0.78-1.01)           | 0.88 (0.77-1.00)   | 0.86 (0.75-0.98)       | 0.86 (0.76-0.98) | 0.92 (0.81-1.06)   |
| 1 serving/week              | 3,148/168,793                 | 0.91 (0.81-1.04) | 0.94 (0.82-1.07)           | 0.94 (0.82-1.07)   | 0.91 (0.80-1.04)       | 0.92 (0.81-1.05) | 0.98 (0.86-1.12)   |
| ≥2 servings/week            | 999/54,974                    | 0.87 (0.76-1.01) | 0.90 (0.78-1.04)           | 0.90 (0.78-1.04)   | 0.87 (0.76-1.00)       | 0.88 (0.77-1.02) | 0.94 (0.81-1.08)   |
| P for trend                 |                               | 0.28             | 0.40                       | 0.49               | 0.28                   | 0.41             | 0.49               |
| Per 1 serving/week          | 6,264/338,134                 | 0.98 (0.94-1.02) | 0.99 (0.95-1.02)           | 0.99 (0.95-1.02)   | 0.98 (0.94-1.02)       | 0.98 (0.95-1.02) | 0.99 (0.95-1.02)   |
| <b>Fish oil supplements</b> |                               |                  |                            |                    |                        |                  |                    |
| 0 (No)                      | 4,406/231,801                 | 1.00 (Referent)  | 1.00 (Referent)            | 1.00 (Referent)    | 1.00 (Referent)        | 1.00 (Referent)  | 1.00 (Referent)    |
| 1 (Yes)                     | 1,858/106,333                 | 0.90 (0.86-0.96) | 0.89 (0.85-0.94)           | 0.92 (0.87-0.97)   | 0.90 (0.85-0.95)       | 0.91 (0.86-0.96) | 0.89 (0.84-0.95)   |
| P value                     |                               | <0.001           | <0.001                     | 0.002              | <0.001                 | 0.001            | <0.001             |

CRP, C-reactive protein; HbA1c, hemoglobin A1c; HDL-C, high-density lipoprotein cholesterol.

\*The analyses included 338,134 participants with measurements of all metabolic biomarkers. Covariates for model 3 were listed in the footnotes to Table 2 (for fish) or Table 3 (for fish oil) in the article, and further included fasting time (hours) for blood samples.
